# Supplementary material for: Improved Adipose Tissue Function after Single Anastomosis Duodeno-Ileal Bypass with Sleeve-Gastrectomy (SADI-S) in Diet-Induced Obesity
Source: MDPI journal article supplement (doi:10.3390/ijms231911641), 2022-10-01
Supplement: s1 [file s1]

**Supplemental Table S1.** Body weight, adiposity and metabolic profile in control groups.

| Determination                | Normal diet<br>(n=10) | High-fat diet<br>(n=10) | <i>P</i>         |
|------------------------------|-----------------------|-------------------------|------------------|
| Body weight (g)              | 504 ± 10              | 536 ± 16                | <b>0.021</b>     |
| Epididymal WAT (g/100 g BW)  | 1.19 ± .07            | 1.79 ± 0.14             | <b>0.041</b>     |
| Subcutaneous WAT(g/100 g BW) | 1.00 ± 0.07           | 1.35 ± 0.14             | <b>0.048</b>     |
| Perirrenal WAT (g/100 g BW)  | 1.17 ± 0.05           | 2.08 ± 0.16             | <b>0.025</b>     |
| BAT (g/100 g BW)             | 0.127 ± 0.009         | 0.156 ± 0.017           | 0.150            |
| Total WAT (g/100 g BW)       | 3.36 ± 0.15           | 5.22 ± 0.41             | <b>0.004</b>     |
| Rectal temperature (°C)      | 36.1 ± 0.1            | 37.1 ± 0.0              | <b>0.003</b>     |
| Glucose (mg/dL)              | 63 ± 5                | 75 ± 4                  | <b>&lt;0.001</b> |
| Insulin (ng/mL)              | 5.0 ± 0.6             | 8.0 ± 1.2               | <b>0.046</b>     |
| HOMA                         | 1.0 ± 0.2             | 1.6 ± 0.3               | <b>0.040</b>     |
| QUICKI                       | 0.39 ± 0.01           | 0.36 ± 0.01             | <b>0.050</b>     |
| FFA (mg/dL)                  | 18 ± 2                | 20 ± 2                  | 0.294            |
| TG (mg/dL)                   | 143 ± 15              | 142 ± 14                | 0.934            |
| Cholesterol (mg/dL)          | 55 ± 3                | 70 ± 5                  | 0.092            |
| Glycerol (mg/dL)             | 0.023 ± 0.001         | 0.026 ± 0.002           | 0.225            |
| Adipo-IR index               | 25.6 ± 0.3            | 47.4 ± 0.6              | <b>0.035</b>     |
| Leptin (ng/mL)               | 5.1 ± 0.7             | 10.2 ± 1.5              | <b>0.032</b>     |
| Adiponectin (ng/mL)          | 1.8 ± 0.3             | 0.8 ± 0.4               | <b>0.050</b>     |
| Adpn/leptin ratio            | 0.42 ± 0.09           | 0.14 ± 0.08             | <b>0.042</b>     |

BW, body weight; WAT, white adipose tissue; Adpn, adiponectin; FFA, free fatty acids; HOMA, homeostasis model assessment; IPITT, intraperitoneal insulin tolerance test; QUICKI, quantitative insulin sensitivity check index; TG, triglycerides. Values presented as the mean ± S.E.M. Statistical differences were analyzed by the Student's *t* test.

**Supplemental Table S2.** Sequences of the primers and TaqMan® probes.

| Gene (GenBank accession number) | Oligonucleotide sequence (5'-3')        |
|---------------------------------|-----------------------------------------|
| <i>Ask1</i> (NM_001277694)      |                                         |
| Forward                         | GCAACCAGGTCAGAATTGCTATTAA               |
| Reverse                         | CTTGTGCTTCAGATGCTTGTGTAAG               |
| TaqMan® Probe                   | FAM-ACAGCAGATACTCTCAGCCCCTGCATGA-TAMRA  |
| <i>Atf7</i> (NM_001108115.1)    |                                         |
| Forward                         | TGGGCCAGGTATACCAGGAAT                   |
| Reverse                         | GCCAGGGCCTCCAGTACAG                     |
| TaqMan® Probe                   | FAM-TATTCGCTGGCCAGA-TAMRA               |
| <i>Bmp7</i> (NM_001191856)      |                                         |
| Forward                         | CCTGCAAGAAACACGAGCCTGT                  |
| Reverse                         | AGGCACACTCTCCCTCACAGT                   |
| TaqMan® Probe                   | FAM-CTGGCAGGACTGGATCA-TAMRA             |
| <i>Cd137</i> (NM_001025773)     |                                         |
| Forward                         | CTGTGGCTTGGGAACGTTTAAT                  |
| Reverse                         | TCTTTCTCCTTGGTCCCATTCTT                 |
| TaqMan® Probe                   | FAM-CCGACCCTGGACGAACTGCTCTCTAGA-TAMRA   |
| <i>Dio2</i> (NM_031720.5)       |                                         |
| Forward                         | ACGCCTACAAACAGGTAAATTG                  |
| Reverse                         | AATTGTTACCTGCTTCAGGATTG                 |
| TaqMan® Probe                   | FAM-CTCCCAATTCCAGTGTG-TAMRA             |
| <i>Fgf21</i> (NM_130752.1)      |                                         |
| Forward                         | CTCTATGGATCGCCTCACTTTGA                 |
| Reverse                         | GCTGGATCCTGGGAGTCCTT                    |
| TaqMan® Probe                   | FAM-CCTGAGGCCTGCAGTTTCAGAGAGCTG-TAMRA   |
| <i>Pgcl1a</i> (NM_031347)       |                                         |
| Forward                         | CGAACCTTAAGTGTGGAATC                    |
| Reverse                         | GGGTATCTTGGTTGGCTTTA                    |
| TaqMan® Probe                   | FAM-AACTGCAGGCCTAATC-TAMRA              |
| <i>Pparg</i> (NM_013124)        |                                         |
| Forward                         | CTGACCCAATGGTTGCTGATTAC                 |
| Reverse                         | CCTGTTGTAGAGTTGGGTTTTTCA                |
| TaqMan® Probe                   | FAM-CCTGAAGCTCCAAGAATACCAAAGTGCGA-TAMRA |
| <i>Prdm16</i> (NC_005104)       |                                         |
| Forward                         | AGTGGCAAGCGCTTCGAA                      |
| Reverse                         | ATGTGACGCTGGAGGTTGCT                    |
| TaqMan® Probe                   | FAM-AAACTGCGTCAAGGTGTT-TAMRA            |
| <i>Pref1</i> (NM_053744.2)      |                                         |
| Forward                         | GATATTCGGGGCTTGACCTCTA                  |
| Reverse                         | GGAGCATTCGTA CTGGCCTTT                  |
| TaqMan® Probe                   | FAM-CCCTGCGCGCCAACAATG-TAMRA            |
| <i>Sirt1</i> (NM_001107627)     |                                         |
| Forward                         | CTGGAGCTGGGGTTTCTGTTT                   |
| Reverse                         | CGAACATGGCTTGAGGATCTG                   |
| TaqMan® Probe                   | FAM-TTATGCTCGCCTTGCTGTGGACTTCC-TAMRA    |
| <i>Sirt3</i> (NM_001106313)     |                                         |
| Forward                         | GACATACGGGCTGACGTGATG                   |
| Reverse                         | GGCGAAATCAGCCACATGTAGT                  |
| TaqMan® Probe                   | FAM-TGCCCCGCTGCCCTGTCTGTACT-TAMRA       |
| <i>Sirt6</i> (NM_001031649.1)   |                                         |
| Forward                         | ATSCGCGGATAAGGGCAAGTG                   |
| Reverse                         | CACAGTGGAGGACTGCCACAT                   |

|                              |                                         |
|------------------------------|-----------------------------------------|
| TaqMan <sup>®</sup> Probe    | FAM-TGCCGAGATATTCGAC-TAMRA              |
| <i>Slc27a1</i> (NM_053580)   |                                         |
| Forward                      | GGCCAACGATGTGCTCTATGA                   |
| Reverse                      | CACCGTTAACCCGTAGATGATACAC               |
| TaqMan <sup>®</sup> Probe    | FAM-CTCTACCACTCAGCAGGGAACATCATGGG-TAMRA |
| <i>Tbx1</i> (NM_001108322)   |                                         |
| Forward                      | AGCTGGGCACCGAGATGAT                     |
| Reverse                      | GGTCCATTCCAAAAAGCTTCACT                 |
| TaqMan <sup>®</sup> Probe    | FAM- CAGGCAGACGAATGTTCCCCACCTT -TAMRA   |
| <i>Tmem26</i> (NM_001107623) |                                         |
| Forward                      | CCGAGGCTACAAATGGCTTTC                   |
| Reverse                      | ACTGGTTTCCATGGTGCATTTC                  |
| TaqMan <sup>®</sup> Probe    | FAM- CCTGATCAACATCATGCCGTCCCTGT -TAMRA  |
| <i>Ucp1</i> (NM_012682)      |                                         |
| Forward                      | TCCCTCAGGATTGGCCTCTAC                   |
| Reverse                      | GCCAGCCGAGATCTTGCTT                     |
| TaqMan <sup>®</sup> Probe    | FAM-TCTTCAGGGAGAAC -TAMRA               |
| <i>Ucp3</i> (NM_013167)      |                                         |
| Forward                      | GCAGTTCTACACCCCAAGG                     |
| Reverse                      | TGCAGCCTGCAGAATCC                       |
| TaqMan <sup>®</sup> Probe    | FAM-ACGGACCACTCCAGCGT-TAMRA             |
| <i>Xbp1</i> (NC_005113)      |                                         |
| Forward                      | CTGACGCTGTTGCCTCTTCAG                   |
| Reverse                      | ACAGGGTCCAACCTGTCCAGAAT                 |
| TaqMan <sup>®</sup> Probe    | FAM-TTCTGAGTCTGATATCCTTTTG-TAMRA        |

*Ask1*, apoptosis signal-regulating kinase 1; *Atf7*, activating transcription factor 7; *Bmp7*, bone morphogenetic protein 7; *Dio2*, iodothyronine deiodinase 2; *Fgf21*, fibroblast growth factor 21; *Pgcl1*, peroxisome proliferative activated receptor coactivator 1 a; *Pparg*, peroxisome proliferator-activated receptor gamma; *Prdm16*, PR domain containing 16; *Pref*, preadipocyte factor 1; *Sirt*, sirtuin; *Slc27a1*, solute carrier family 27 member 1; *Tbx1*, T-Box transcription factor 1; *Tmem26*; transmembrane protein 26; *Ucp*, uncoupling protein; *Xbp1*, X-box binding protein 1.

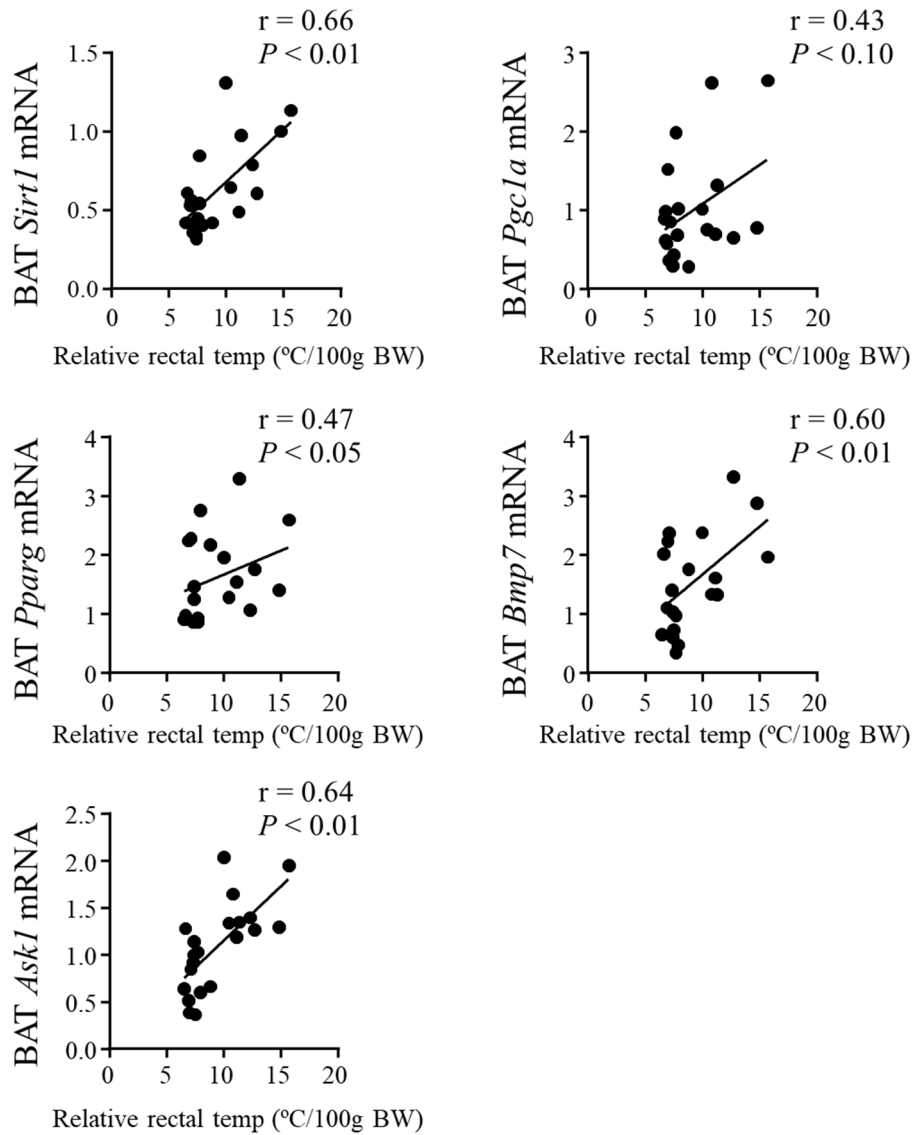

**Supplemental Figure S1.** Scatter diagrams showing the positive association between normalized rectal temperature and (a) *Sirt1*, (b) *Pgc1a*, (c) *Pparg*, (d) *Bmp7* and (e) *Ask1* mRNA levels. Pearson's correlation coefficient and  $P$  value are indicated. BW, body weight.
